# Supplementary material for: A Li–urine battery based on organic/aqueous hybrid electrolytes
Source: Royal Society of Chemistry journal article supplement (doi:10.1039/c9qi00291j), 2019-01-01
Supplement: c9qi00291j1.pdf [file c9qi00291j1.pdf]

## Electronic Supplementary Information

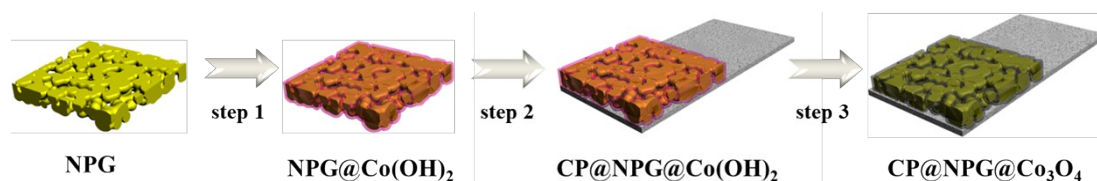

**Figure S1.** Schematic diagram of the preparation procedure of the CP@NPG@Co<sub>3</sub>O<sub>4</sub> composites.

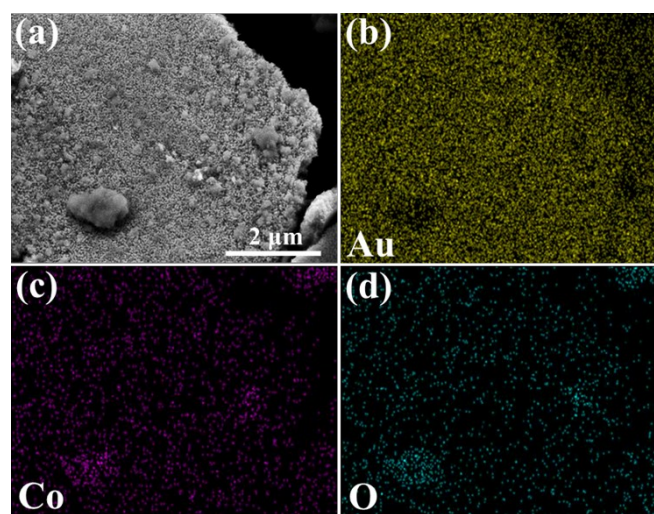

**Figure S2.** (a) SEM image and (b, c, d) the corresponding elemental mapping of the NPG@Co<sub>3</sub>O<sub>4</sub> composites.

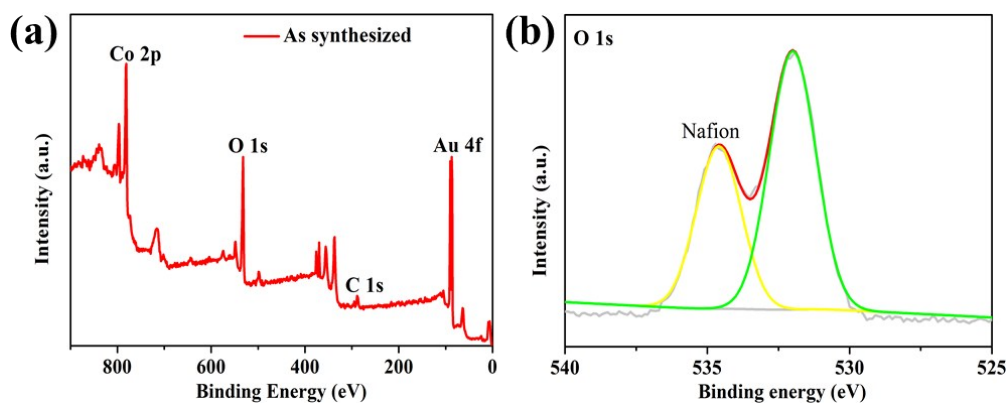

**Figure S3.** (a) survey and (b) O 1s XPS spectra of NPG@Co<sub>3</sub>O<sub>4</sub> composites.

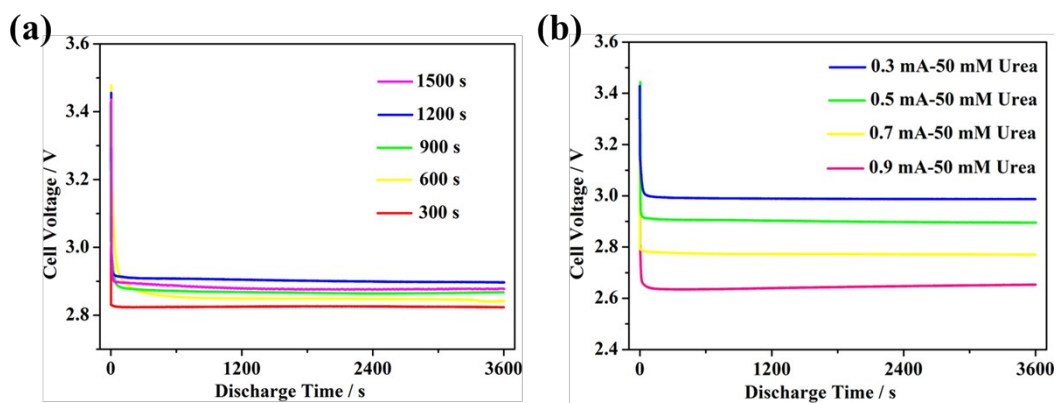

**Figure S4.** The discharge time was set to 1h. (a) Discharge curves in different electrochemical deposition time (seconds) at 0.5 mA cm<sup>-2</sup>. (b) Discharge curves at current densities ranging from 0.3 to 0.9 mA cm<sup>-2</sup>.

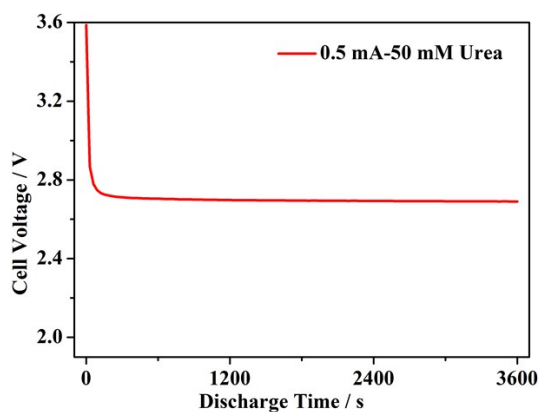

**Figure S5.** Discharge curve of pure NPG film in 50 mM urea + 50 mM  $\text{Li}_2\text{SO}_4$  aqueous solution at  $0.5 \text{ mA cm}^{-2}$ .

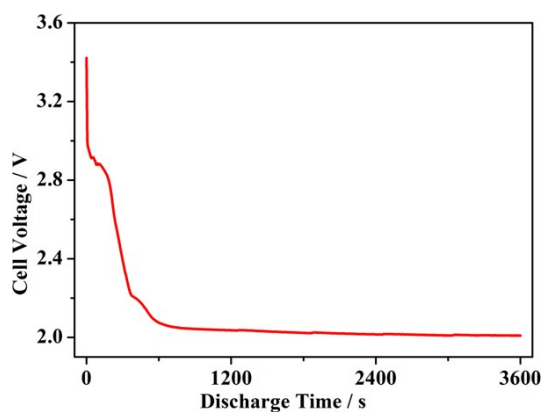

**Figure S6.** Discharge curve of CP@NPG@ $\text{Co}_3\text{O}_4$  composites in 0.5 M  $\text{Li}_2\text{SO}_4$  aqueous solution at  $0.5 \text{ mA cm}^{-2}$ .

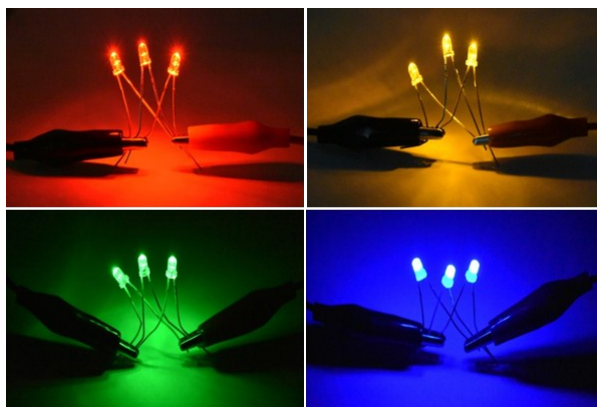

**Figure S7.** Digital graphs of red, yellow, green and blue LEDs in parallel being driven by a CP@NPG@ $\text{Co}_3\text{O}_4$  based LFB (simulated urine), respectively.

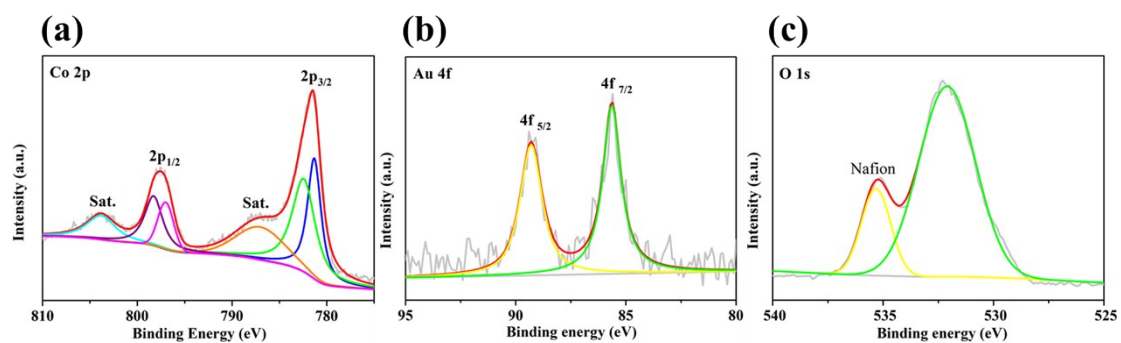

**Figure S8.** (a) Co 2p ; (b) Au 4f ; (c) O 1s XPS spectra of NPG@Co<sub>3</sub>O<sub>4</sub> composites after discharged 5 days.

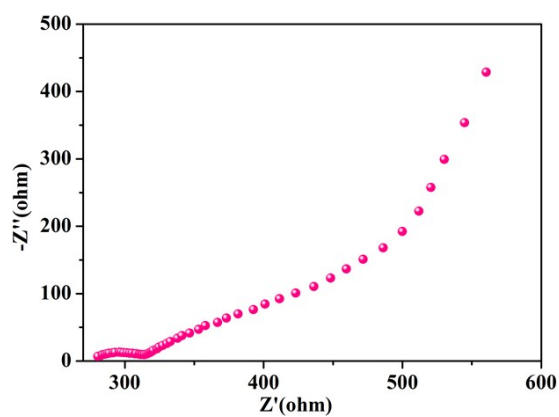

**Figure S9.** EIS (presented in scatterplot) curves of the LFB.

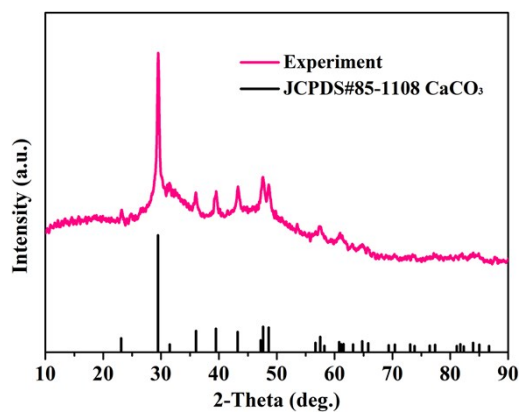

**Figure S10.** XRD patterns of JCPDS card of  $\text{CaCO}_3$  phases and experiment (Precipitates collected from adding  $\text{CaCl}_2$  solution to the catholyte after discharge 5 days).
